# Supplementary material
Source: publisher figshare collection journal article supplement (https://sage.figshare.com/ndownloader/files/17961710)
Supplement: Supplementary file 1 [file 17961710]

The FTIR spectrum of the PUR sample was recorded and is displayed in **Fig. S1**. The absorption bands at  $3396\text{ cm}^{-1}$  corresponded to the N-H stretching mode. The peak at  $1519\text{ cm}^{-1}$  confirmed the combination of N-H out-of-plane bending and C-N stretching mode. Bands at  $2971$  and  $2925\text{ cm}^{-1}$  were associated with  $-\text{CH}_2$  stretching, while other modes of  $-\text{CH}_2$  were identified by the bands at  $1313$  and  $1413\text{ cm}^{-1}$ . In addition, the absorption band at  $1718\text{ cm}^{-1}$  was associated with a C=O group. The absorption bands at  $1079$  and  $1230\text{ cm}^{-1}$  originated from a C-O-C group. There were phenyl absorption bands located at  $3122$ ,  $3019$ ,  $1602$ ,  $817$  and  $767\text{ cm}^{-1}$ . These characteristic peaks indicated that the PUR sample could be ascribed to polyester polyurethane.

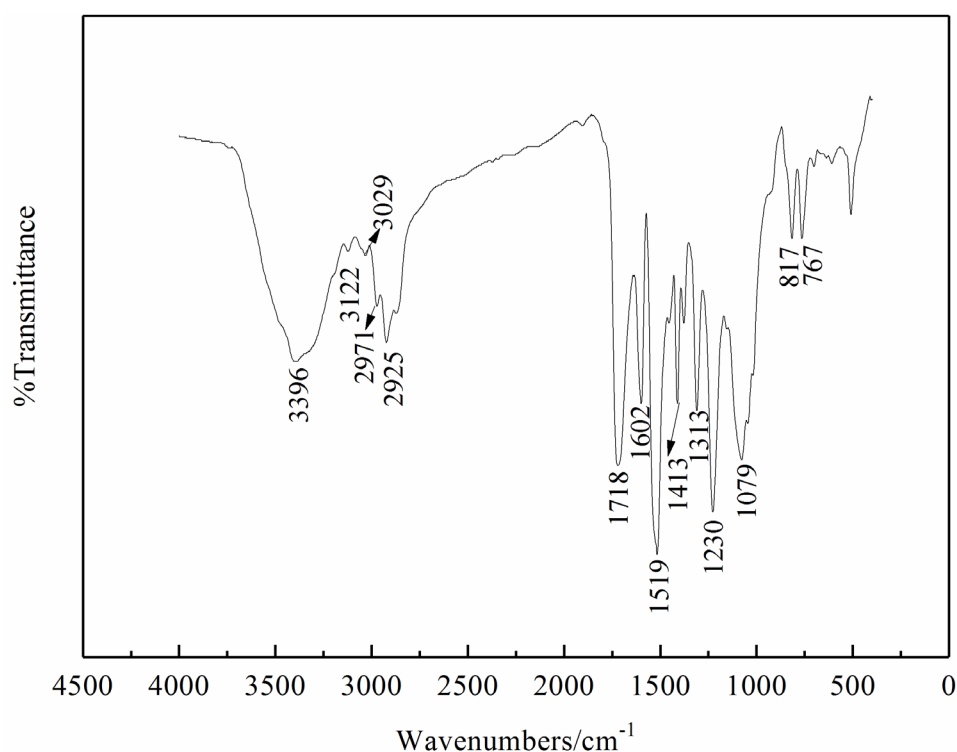

**Fig. S1. FT-IR spectrum of *PUR* sample**

**Table S1. Model-fitting and model-free methods used**

| Methods  | Equations                                                                          | Plotting method                                                                                |
|----------|------------------------------------------------------------------------------------|------------------------------------------------------------------------------------------------|
| CR       | $\ln \frac{g(a)}{T^2} = \ln \frac{AR}{\beta E_\alpha} - \frac{E_\alpha}{RT}$       | $\ln \frac{g(a)}{T^2}$ against $\frac{1}{T}$ , Slope=-<br>$E_\alpha/R$                         |
| Friedman | $\ln(\beta \frac{d\alpha}{dT}) = \ln[Af(\alpha)] - \frac{E_\alpha}{RT}$            | $\ln(\beta \frac{d\alpha}{dT})$ against $\frac{1}{T}$ , Slope=-<br>$E_\alpha/R$                |
| FWO      | $\ln \beta = \ln \frac{AE_\alpha}{Rg(\alpha)} - 5.331 - 1.052 \frac{E_\alpha}{RT}$ | $\ln \beta$ against $\frac{1}{T}$ , Slope=-<br>$1.052E_\alpha/R$                               |
| Tang     | $\ln \frac{\beta}{T^{1.894661}} = -1.00145033 \frac{E_\alpha}{RT} + C$             | $\ln \frac{\beta}{T^{1.894661}}$ against $\frac{1}{T}$ ,<br>Slope=-1.00145033E <sub>α</sub> /R |
